# Supplementary material for: COHESION: a core outcome set for the treatment of neonatal encephalopathy
Source: PubMed Central journal article supplement (PMC10920183; doi:10.1038/s41390-023-02938-y), 2023-12-22
Supplement: 41390_2023_2938_MOESM1_ESM.pdf [file 41390_2023_2938_MOESM1_ESM.pdf]

**Appendix 1:** List of outcomes included in the Delphi survey (note (\*) denotes that the outcome was suggested in the Delphi process, (^) denotes that the outcome was excluded in the Delphi process.

- Brain injury on imaging
- Electroencephalogram (EEG) abnormalities
- Biomarker evidence of brain injury
- Intracranial haemorrhage
- Severity of encephalopathy
- Absence of neonatal reflexes
- Gag reflex (absent)
- Swallow (absent)
- Neonatal seizures
- Sleep disorders
- Normal tone
- Abnormal changes in heart rate or rhythm
- Coagulopathy
- Thrombosis
- Hypertension (and management)
- Hypotension (and management)
- Haematological variables
- Myocardial dysfunction
- Cardiac ischemia
- Need for neonatal resuscitation
- Oxygen requirement
- Need for mechanical ventilation
- Need for inhaled nitric oxide
- Need for extracorporeal membrane oxygenation use
- Respiratory distress
- Ability to breathe normally and unaided
- Persistent pulmonary hypertension
- Lung air leaks<sup>^</sup>
- Pulmonary haemorrhage
- Feeding intolerance
- Need for tube feeding
- Necrotising enterocolitis
- Oral feeding ability
- Need for surgical treatment of gastro-oesophageal reflux disease<sup>^</sup>
- Meconium Passage<sup>^</sup>
- General gross motor ability
- Fine motor development
- Ability to undertake sport<sup>^</sup>
- Need for physiotherapy\*
- General cognitive ability
- Normal memory
- Child mental health

- Heightened sensory sensitivity
- Hearing impairment
- Visual impairment
- Speech delay
- Ability to make noises/ verbalise
- General communication ability
- Psychological development
- Self-esteem
- Behavioural challenges
- Development of Attention Deficit/ Hyperactive Disorder (ADHD)\*
- Development of Autism Spectrum Disorder (ASD)\*
- Cerebral palsy
- Epilepsy
- Requirement for antiepileptic drugs at discharge
- Need for occupational therapy
- Survival
- Suffering
- Growth
- Full recovery from acute illness
- Requirement for analgesics
- Quality of life of patient
- Sepsis
- Pyrexia
- Duration of neonatal stay
- Readmission in childhood
- Healthcare costs
- Need for multiple operations
- Adverse event related to treatment
- Poor renal function
- Hepatic dysfunction
- Electrolyte disturbance
- Metabolic acidosis
- Pneumonia
- Hyperglycemia^
- Hypoglycemia
- Hypoxia
- Jaundice\*^
- Multi-organ dysfunction
- Emotional impact on parents
- Parental involvement in care
- Parental attachment with their baby
- Parental senses of loss of normal
- Uncertainty for future wellbeing
- Parental psychological impact of NICU experience
- Impact of child's condition on parent's relationship
- Financial burden of healthcare costs of care for an infant on parents
- Parental ability to work

- Impact of child's condition and neonatal intensive care unit (NICU) experience on wider family (stress, disappointment, sadness, grief etc.)
- Effective communication
- Impact on family decision to have other children\*

**Appendix 2:** Outcomes brought forward to the consensus meetings.

| <b>Outcome</b>                               | <b>Consensus result</b> |
|----------------------------------------------|-------------------------|
| <b>Neurological</b>                          |                         |
| Brain injury on imaging                      | in                      |
| EEG abnormalities                            | undetermined            |
| Biomarker evidence of brain injury           | undetermined            |
| Severity of encephalopathy                   | in                      |
| Absence of neonatal reflexes                 | in                      |
| Gag reflex (absence)                         | in                      |
| Swallow (absent)                             | in                      |
| Neonatal seizures                            | in                      |
| Sleep Disorders                              | undetermined            |
| Normal Tone                                  | in                      |
| Intracranial haemorrhage                     | in                      |
| <b>cardiovascular</b>                        |                         |
| Abnormal changes in heart rate or rhythm     | undetermined            |
| Coagulopathy                                 | undetermined            |
| Thrombosis                                   | undetermined            |
| Hypotension                                  | undetermined            |
| Hypertension                                 | undetermined            |
| Haematological variables                     | undetermined            |
| Myocardial Dysfunction                       | undetermined            |
| Cardiac Ischemia                             | undetermined            |
| <b>adverse events</b>                        |                         |
| Adverse events                               | in                      |
| <b>respiratory</b>                           |                         |
| Need for neonatal resuscitation              | in                      |
| Oxygen requirement                           | in                      |
| Need for mechanical ventilation              | in                      |
| Need for extracorporeal membrane oxygenation | undetermined            |
| Need for inhaled nitric oxide                | undetermined            |
| Respiratory distress                         | in                      |
| Ability to breathe normally and unaided      | in                      |
| Persistent pulmonary hypertension            | undetermined            |
| Pulmonary haemorrhage                        | undetermined            |

|                                                  |              |
|--------------------------------------------------|--------------|
| <b>gastrointestinal</b>                          |              |
| Feeding intolerance                              | undetermined |
| Need for tube feeding                            | in           |
| Necrotising enterocolitis                        | undetermined |
| Oral feeding ability                             | in           |
| <b>motor development</b>                         |              |
| General gross motor ability                      | in           |
| General fine motor ability                       | in           |
| Need for physiotherapy                           | in           |
| <b>patient-reported outcomes</b>                 |              |
| Quality of life of patient                       | in           |
| <b>cognitive</b>                                 |              |
| General cognitive ability                        | in           |
| Normal memory                                    | in           |
| Child mental Health                              | in           |
| ADHD                                             | undetermined |
| ADD                                              | in           |
| <b>development (special senses)</b>              |              |
| Heightened sensory sensitivity                   | undetermined |
| Hearing impairment                               | undetermined |
| Visual impairment                                | in           |
| <b>development (speech &amp; social)</b>         |              |
| Speech delay                                     | in           |
| Ability to make noises/ verbalise                | in           |
| General communication ability                    | in           |
| <b>development (psychosocial)</b>                |              |
| Psychological development                        | in           |
| Self esteem                                      | in           |
| Behaviour challenges                             | in           |
| <b>infection outcomes</b>                        |              |
| Sepsis                                           | undetermined |
| Pyrexia                                          | undetermined |
| <b>long-term disability</b>                      |              |
| Cerebral palsy                                   | in           |
| Epilepsy                                         | in           |
| Requirement for antiepileptic drugs at discharge | undetermined |
| Need for occupational therapy                    | undetermined |
| <b>survival/ living outcomes</b>                 |              |
| Survival                                         | in           |
| Suffering                                        | in           |
| Growth                                           | undetermined |
| Full recovery from acute illness                 | in           |
| Requirement for analgesics                       | undetermined |
| <b>other organ outcomes</b>                      |              |
| Poor renal function                              | undetermined |

|                                                                   |              |
|-------------------------------------------------------------------|--------------|
| Hepatic dysfunction                                               | undetermined |
| Metabolic acidosis                                                | undetermined |
| Pneumonia                                                         | undetermined |
| Electrolyte disturbance                                           | undetermined |
| Hypoglycaemia                                                     | undetermined |
| Hypoxia                                                           | in           |
| Multi-organ dysfunction                                           | in           |
| <b>parent-important outcomes</b>                                  |              |
| Emotional impact on parents                                       | in           |
| Parental involvement in care                                      | in           |
| Parental attachment with their baby                               | in           |
| Parental sense of loss of normal                                  | in           |
| Uncertainty for future wellbeing                                  | in           |
| Parental psychological impact of NICU experience                  | in           |
| Impact of child's condition on parent's relationship              | in           |
| Financial burden of healthcare costs of care for an infant parent | in           |
| Parental ability to work                                          | undetermined |
| Impact of child's condition on NICU experience                    | undetermined |
| Effective communication                                           | in           |
| Impact on family decision to have other children                  | undetermined |
| <b>hospitalisation outcomes</b>                                   |              |
| Duration of neonatal stay                                         | undetermined |
| Readmission in childhood                                          | in           |
| <b>healthcare utilisation</b>                                     |              |
| Healthcare costs                                                  | undetermined |
| Need for multiple operations                                      | undetermined |

### Appendix 3: COS-STAR Checklist.

| SECTION/TOPIC             | ITEM No. | CHECKLIST ITEM                                                            | PAGE NUMBER |
|---------------------------|----------|---------------------------------------------------------------------------|-------------|
| <b>TITLE/ABSTRACT</b>     |          |                                                                           |             |
| Title                     | 1a       | Identify in the title that the paper reports the development of a COS     | 1           |
| Abstract                  | 1b       | Provide a structured summary                                              | 4           |
| <b>INTRODUCTION</b>       |          |                                                                           |             |
| Background and Objectives | 2a       | Describe the background and explain the rationale for developing the COS. | 5 - 7       |

|                         |     |                                                                                                                                                                                                                  |                  |
|-------------------------|-----|------------------------------------------------------------------------------------------------------------------------------------------------------------------------------------------------------------------|------------------|
|                         | 2b  | Describe the specific objectives with reference to developing a COS.                                                                                                                                             | 7                |
| Scope                   | 3a  | Describe the health condition(s) and population(s) covered by the COS.                                                                                                                                           | 7                |
|                         | 3b  | Describe the intervention(s) covered by the COS.                                                                                                                                                                 | 7                |
|                         | 3c  | Describe the setting(s) in which the COS is to be applied.                                                                                                                                                       | 7                |
| <b>METHODS</b>          |     |                                                                                                                                                                                                                  |                  |
| Protocol/Registry Entry | 4   | Indicate where the COS development protocol can be accessed, if available, and/or the study registration details.                                                                                                | 7 & 8            |
| Participants            | 5   | Describe the rationale for stakeholder groups involved in the COS development process, eligibility criteria for participants from each group, and a description of how the individuals involved were identified. | 9 & 10           |
| Information Sources     | 6a  | Describe the information sources used to identify an initial list of outcomes.                                                                                                                                   | 10 & 11          |
|                         | 6b  | Describe how outcomes were dropped/combined, with reasons (if applicable).                                                                                                                                       | Figure 2         |
| Consensus Process       | 7   | Describe how the consensus process was undertaken.                                                                                                                                                               | 11 & 12          |
| Outcome Scoring         | 8   | Describe how outcomes were scored and how scores were summarised.                                                                                                                                                | 12 - 14          |
| Consensus Definition    | 9a  | Describe the consensus definition.                                                                                                                                                                               | 12               |
|                         | 9b  | Describe the procedure for determining how outcomes were included or excluded from consideration during the consensus process.                                                                                   | Table 1          |
| Ethics and Consent      | 10  | Provide a statement regarding the ethics and consent issues for the study.                                                                                                                                       | 8                |
| <b>RESULTS</b>          |     |                                                                                                                                                                                                                  |                  |
| Protocol Deviations     | 11  | Describe any changes from the protocol (if applicable), with reasons, and describe what impact these changes have on the results.                                                                                | 16 & 17, 18 - 20 |
| Participants            | 12  | Present data on the number and relevant characteristics of the people involved at all stages of COS development.                                                                                                 | 14 & 15          |
| Outcomes                | 13a | List all outcomes considered at the start of the consensus process.                                                                                                                                              | 15 - 18          |

|                          |     |                                                                                                                    |          |
|--------------------------|-----|--------------------------------------------------------------------------------------------------------------------|----------|
|                          | 13b | Describe any new outcomes introduced and any outcomes dropped, with reasons, during the consensus process.         | Figure 2 |
| COS                      | 14  | List the outcomes in the final COS.                                                                                | 18       |
| <b>DISCUSSION</b>        |     |                                                                                                                    |          |
| Limitations              | 15  | Discuss any limitations in the COS development process.                                                            | 20 - 22  |
| Conclusions              | 16  | Provide an interpretation of the final COS in the context of other evidence, and implications for future research. | 18 - 23  |
| <b>OTHER INFORMATION</b> |     |                                                                                                                    |          |
| Funding                  | 17  | Describe sources of funding/role of funders.                                                                       | 31       |
| Conflicts of Interest    | 18  | Describe any conflicts of interest within the study team and how these were managed.                               | 31       |

**Appendix 4:** Schematic of outcomes identified and prioritised in the COHESION Core Outcome Set development process.

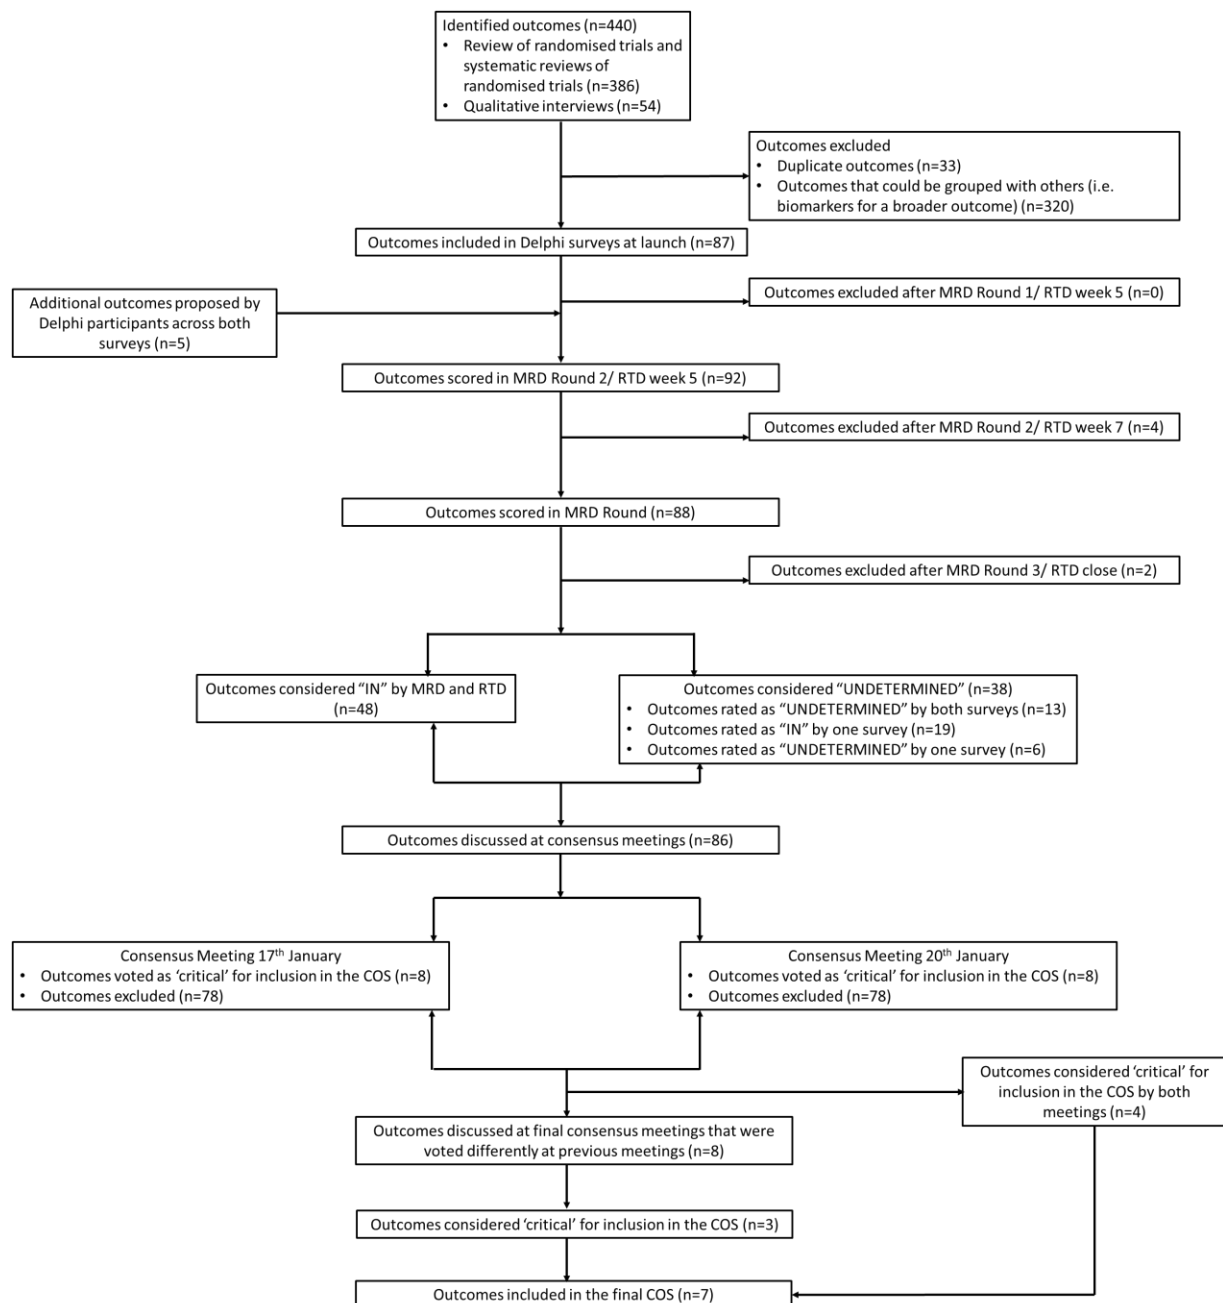

**Appendix 5:** Outcomes considered important to measure in future trials but not critical for inclusion in the COS.

- Electroencephalogram (EEG) abnormalities
- Neonatal seizures
- Biomarker evidence of brain injury
- Absence of neonatal reflexes
- Gag reflex (absent)
- Swallow (absent)
- Severity of encephalopathy
- Normal tone
- Abnormal changes in heart rate or rhythm



- Coagulopathy
- Myocardial dysfunction
- Cardiac ischemia
- Respiratory distress
- Need for mechanical ventilation
- Oxygen requirement
- Need for extracorporeal membrane oxygenation (ECMO)
- Need for inhaled nitric oxide (NO)
- Persistent pulmonary hypertension
- Ability to breathe normally and unaided
- Pulmonary haemorrhage
- Suffering
- Growth
- Sepsis
- Pyrexia
- Full recovery from acute illness
- Healthcare costs
- Multi-organ dysfunction
- Duration of neonatal stay
- Readmission in childhood
- Poor renal function
- Hepatic dysfunction
- Metabolic acidosis
- Pneumonia
- Hypoglycemia
- Hypoxia
- Parental quality of life
- Feeding ability
- General fine motor ability
- Need for physiotherapy
- Normal memory
- Child mental health
- Attention deficit hyperactivity disorder (ADHD)
- Heightened sensory sensitivity
- Hearing impairment
- Visual Impairment
- Speech delay
- Ability to make noises/ verbalise
- General communication ability
- Psychological development
- Self esteem
- Behavioural challenges
- Epilepsy
- Need for occupational therapy
